# Supplementary material
Source: PubMed Central journal article supplement (PMC2933655)

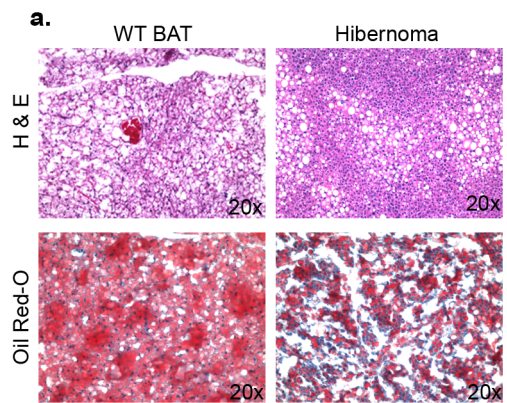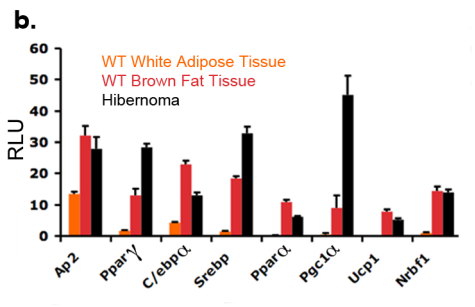

Calo et al. Supplementary Figure 2

Supplement: NIHMS212109-supplement-2.pdf [file NIHMS212109-supplement-2.pdf]

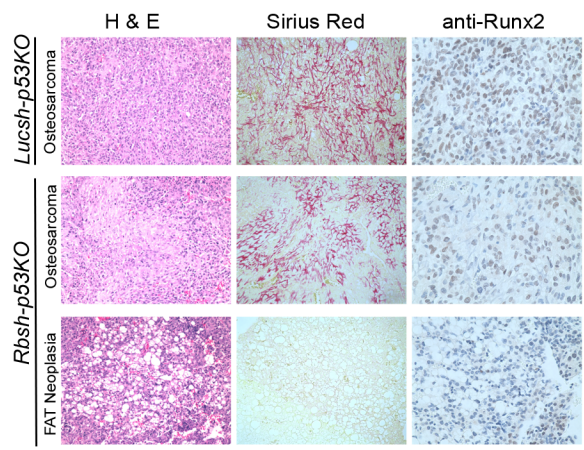

Calo et al. Supplementary Figure 4

Supplement: NIHMS212109-supplement-4.pdf [file NIHMS212109-supplement-4.pdf]

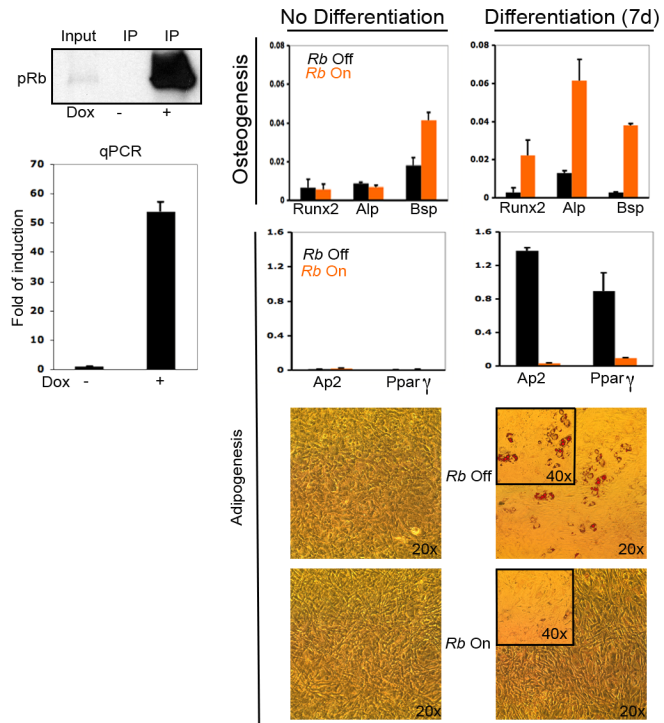

Calo et al. Supplementary Figure 5

Supplement: NIHMS212109-supplement-5.pdf [file NIHMS212109-supplement-5.pdf]
